# Supplementary material for: Interspecific differences in how habitat degradation affects escape response
Source: PubMed Central journal article supplement (PMC5428724; doi:10.1038/s41598-017-00521-0), 2017-03-27
Supplement: 41598_2017_521_MOESM1_ESM.pdf [file 41598_2017_521_MOESM1_ESM.pdf]

## Supplementary information

### Interspecific differences in how habitat degradation affects escape response

Mark I. McCormick, Bridie J. M. Allan

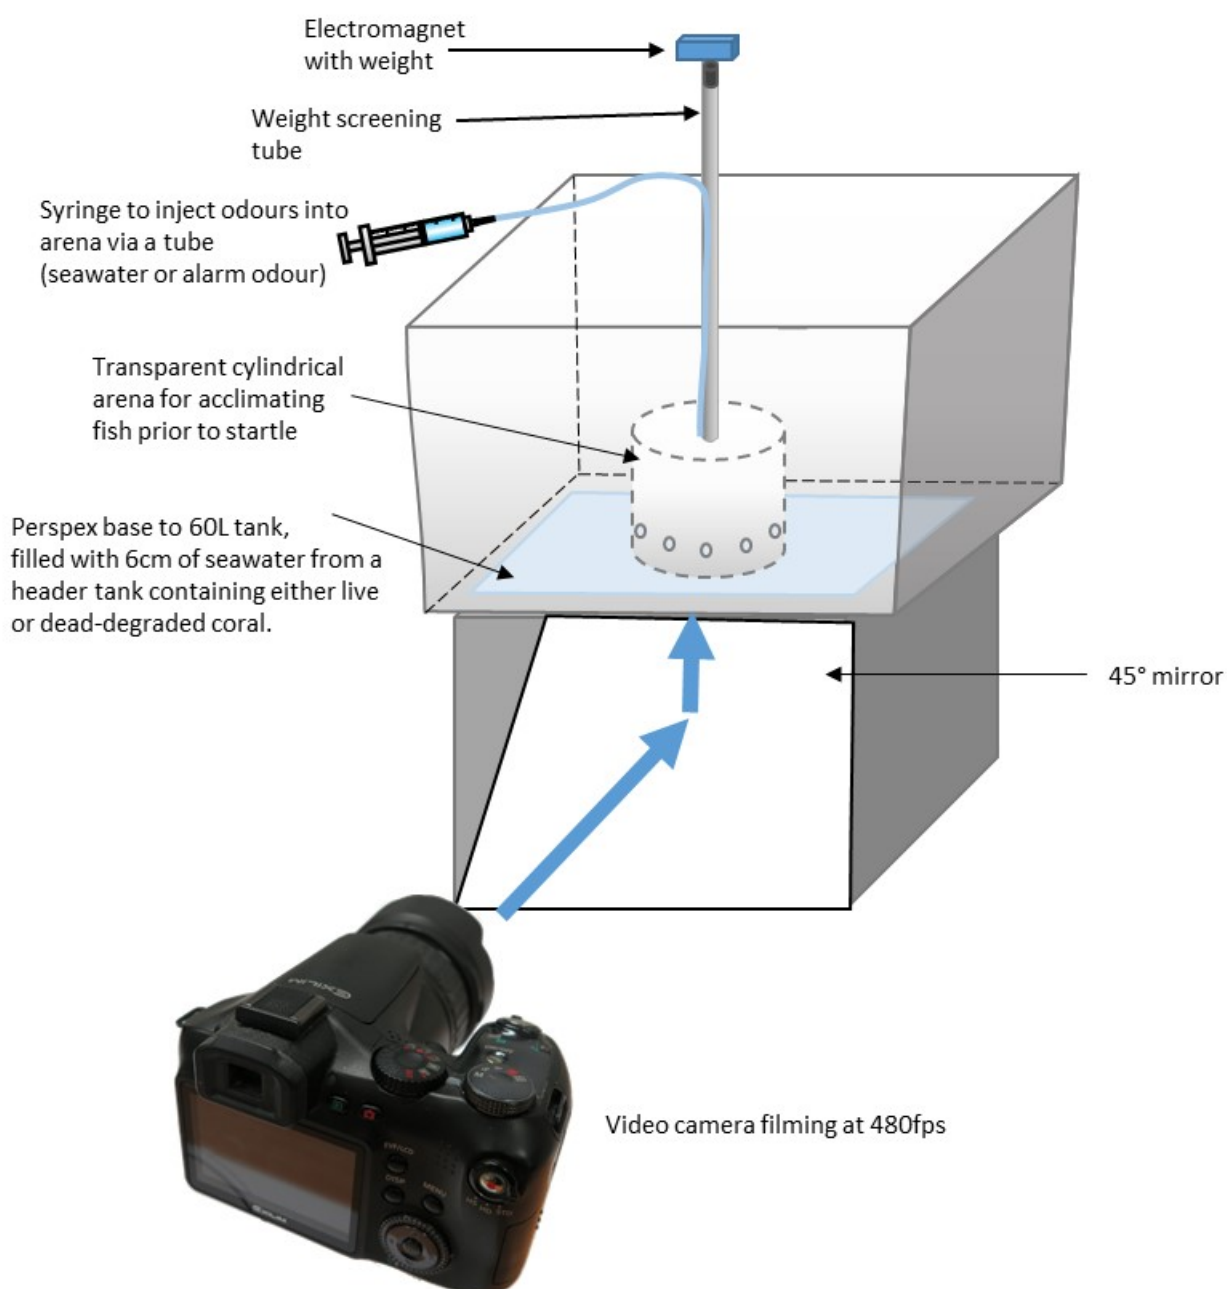

**Figure S1. Fast-start arena set-up.** One of three species of juvenile damselfish were acclimated for 5 min in the cylindrical arena containing seawater that had passed live or dead coral, then exposed to either an seawater (control) or alarm odour for 5 min, prior to being exposed to a drop startle-stimulus. Camera photograph and diagram elements credit M. McCormick.

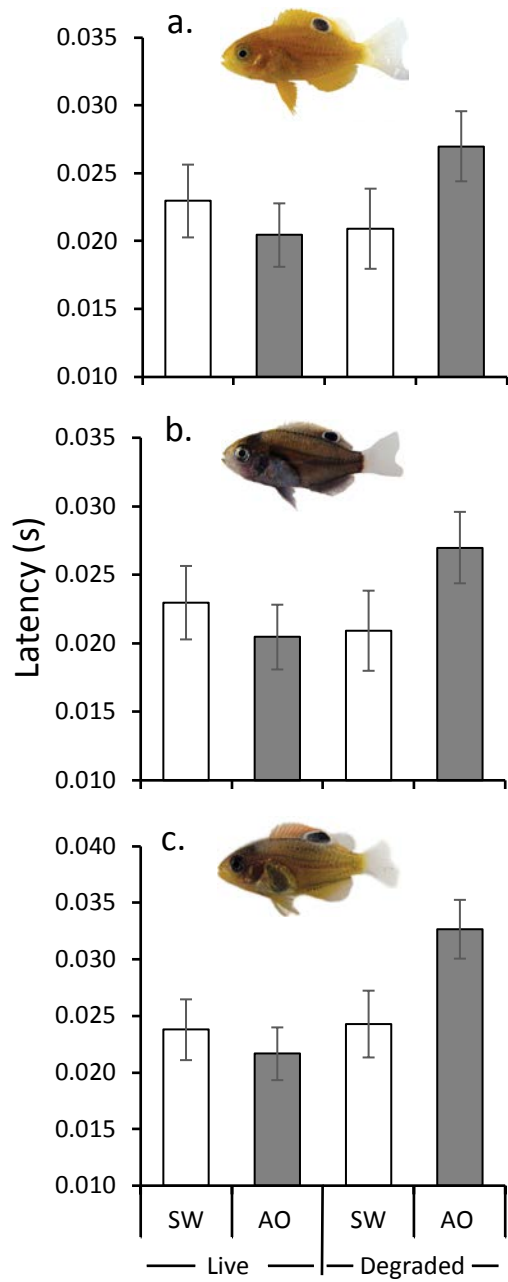

**Figure S2.** Mean latency ( $\pm$  SE) of the fast start response to a startle stimulus of 3 species of juvenile damselfish: a) Ambon damsel *Pomacentrus amboinensis*, b) white-tail damsel *P. chrysurus*, c) Ward's damsel *P. wardi*. Fish were acclimated to water that had passed over live or dead-degraded coral for 2 days, then exposed to conspecific alarm odours (AO) or a seawater control (SW) just prior to the startle stimulus. N = 17-23. Photographs by M. McCormick.
